# Supplementary material for: A highly efficient bio-based plasticizer constructed from renewable oleic acids for plasticizing and enhancing the properties of polylactic acid
Source: Royal Society of Chemistry journal article supplement (doi:10.1039/d4nj04926h), 2025-01-01
Supplement: d4nj04926h1.pdf [file d4nj04926h1.pdf]

## Supporting Information

### **A highly efficient bio-based plasticizer constructed from renewable oleic acids for plasticizing and enhancing the properties of Polylactic acid**

Tengfei Niu,<sup>\*a</sup> Yifan Yan<sup>a</sup>, Ting Han<sup>a</sup>, Zhongjian Tian<sup>b</sup> and Bangqing Ni<sup>\*a</sup>

<sup>a</sup> Key Laboratory of Synthetic and Biological Colloids, Ministry of Education, School of Chemical and Material Engineering, Jiangnan University, Wuxi 214122, China.

<sup>b</sup> State Key Laboratory of Biobased Material and Green Papermaking, Qilu University of Technology, Shandong Academy of Sciences, Jinan, 250353.

# 1. ESI-MS spectra of plasticizers

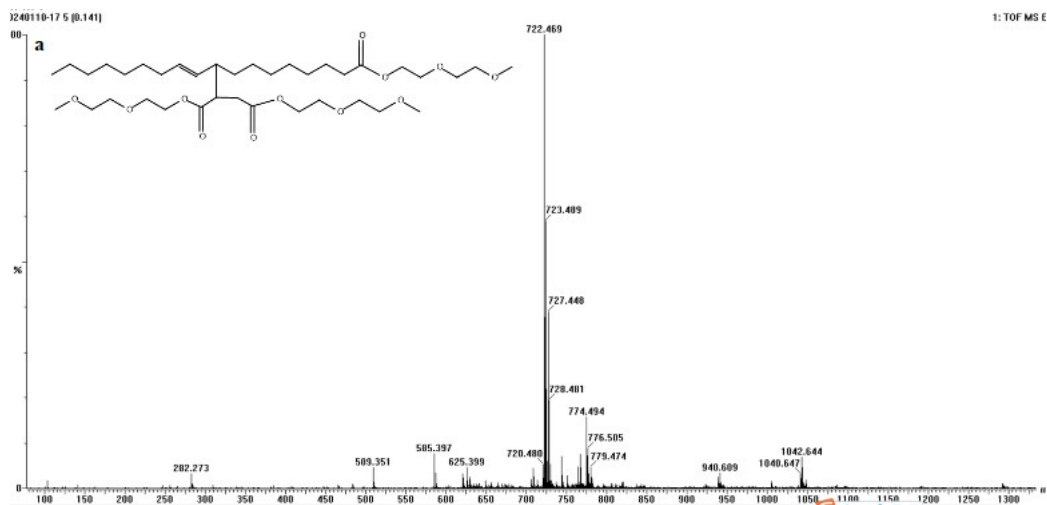

BTA-OA-MME (M=704), m/z=727:  $[M+23(\text{Na})]^+$ , m/z=723  $[M+19(\text{H}_2\text{O}+\text{H})]^+$

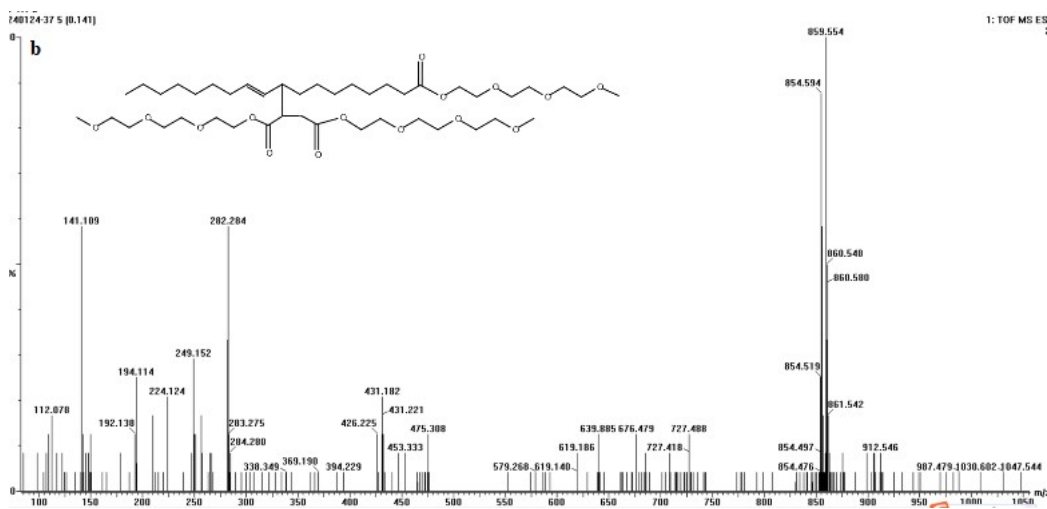

BTA-OA-TEGDM (M=836), m/z=859  $[M+23(\text{Na})]^+$



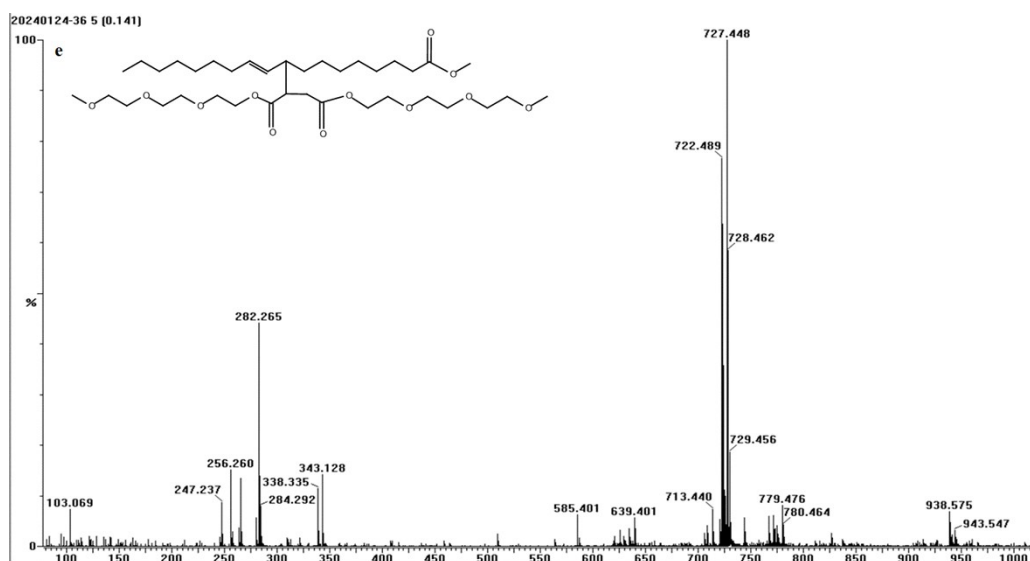

BTA-ME-TEGDM (M=704),  $m/z=727 [M+23(\text{Na})]^+$

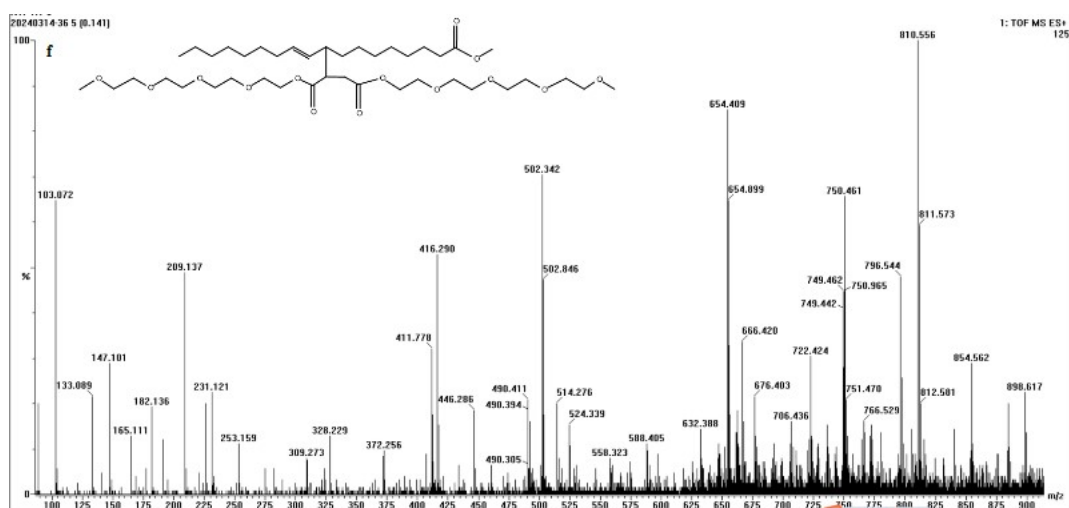

BTA-ME-MTEG (M=792),  $m/z=811 [M+19(\text{H}_2\text{O}+\text{H})]^+$

Fig.S1 Mass spectra of different plasticizer molecules: a: BTA-OA-MME, b: BTA-OA-TEGDM, c: BTA-OA-MTEG, d: BTA-ME-MME, e: BTA-ME-TEGDM, f: BTA-ME-MTEG.

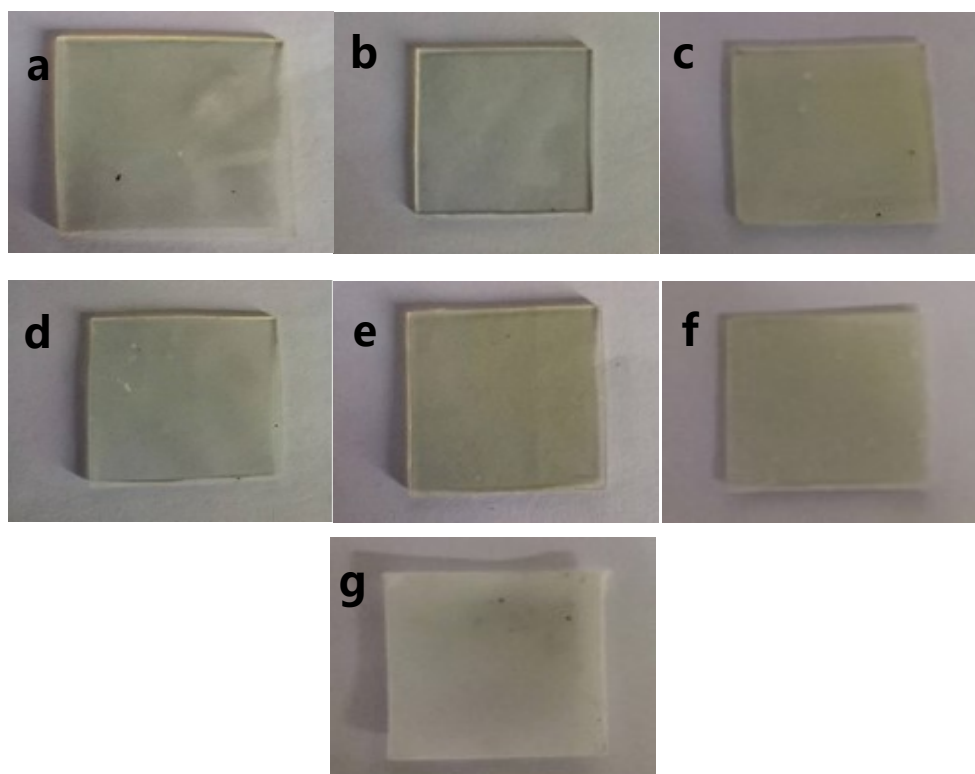

Fig.S2 the image of plasticized PLA blend with: a: BTA-OA-MME, b: BTA-OA-TEGDM, c: BTA-OA-MTEG, d: BTA-ME-MME, e: BTA-ME-TEGDM, f: BTA-ME-MTEG, g: DOTP.
